# Supplementary material for: Integrated MicroRNA and mRNA Signatures Associated with Survival in Triple Negative Breast Cancer
Source: PLoS One. 2013 Feb 6;8(2):e55910. doi: 10.1371/journal.pone.0055910 (PMC3566108; doi:10.1371/journal.pone.0055910)
Supplement: Table S1 — 20 deregulated miRNAs in matched Normal vs Tumor samples (A) and unmatched (B). (XLSX) [file pone.0055910.s006.xlsx]

## Sheet: Sheet1
Deregulated miRNAs in Paired Normal vs Tumor samples
	Mean		logFC	Adj-p-value
miRNAs	Normal	Tumor	Normal vs Tumor	Normal vs Tumor
hsa-miR-107	2.06325	4.31075	2.25	<0.001
hsa-miR-1225-3p	1.95225	1.07075	-0.88	<0.001
hsa-miR-1261	3.27425	1.86975	-1.4	<0.001
hsa-miR-1274a	12.6967	13.3255	0.63	<0.001
hsa-miR-1280	2.856	1.19075	-1.67	<0.001
hsa-miR-1299	1.42025	3.9675	2.55	<0.001
hsa-miR-154	3.16	1.48375	-1.68	<0.001
hsa-miR-193a-3p	2.9375	1.537	-1.4	<0.001
hsa-miR-19a	1	2.7475	1.75	<0.001
hsa-miR-2054	2.68725	1.3	-1.39	<0.001
hsa-miR-210	1	2.64425	1.64	<0.001
hsa-miR-377	4.1325	2.49625	-1.64	<0.001
hsa-miR-409-5p	2.0375	0.9235	-1.11	<0.001
hsa-miR-454	1.13175	3.38375	2.25	<0.001
hsa-miR-455-5p	1.46875	4.053	2.58	<0.001
hsa-miR-491-5p	2.68125	1.27425	-1.41	<0.001
hsa-miR-548a-3p	2.8245	1.41475	-1.41	<0.001
hsa-miR-548b-3p	3.72825	1.918	-1.81	<0.001
hsa-miR-566	3.76025	1.8345	-1.93	<0.001
hsa-miR-627	3.9915	2.464	-1.53	<0.001
Supplementary Table 1 A
Deregulated miRNAs in Unpaired Normal vs Tumor samples
	Mean		logFC	Adj-p-value
miRNAs	Normal	Tumor	Normal vs Tumor	Normal vs Tumor
hsa-let-7b	12.4251	11.9567	-0.468355	<0.001
hsa-let-7f	3.92966	6.30988	2.38022	<0.001
hsa-miR-1260	13.5781	13.2315	-0.346677	0.01
hsa-miR-1305	3.66898	4.80727	1.13829	0.001
hsa-miR-1308	8.57153	9.24666	0.675137	<0.001
hsa-miR-146a	7.79593	8.5174	0.721464	<0.001
hsa-miR-146b-5p	4.13017	5.0883	0.958134	0.004
hsa-miR-148a	7.29339	7.97139	0.678003	0.01
hsa-miR-148b	4.47729	5.22485	0.747561	0.001
hsa-miR-150	9.95424	8.36443	-1.58981	<0.001
hsa-miR-181a	6.78712	8.47055	1.68343	<0.001
hsa-miR-186	5.02746	6.2443	1.21684	<0.001
hsa-miR-196b	6.00203	4.87242	-1.12961	<0.001
hsa-miR-199a-5p	7.95136	6.31254	-1.63881	<0.001
hsa-miR-200a	8.79644	9.12527	0.328831	0.005
hsa-miR-200b	7.98102	9.44952	1.4685	<0.001
hsa-miR-200c	9.19661	10.4169	1.2203	<0.001
hsa-miR-22	6.64525	7.56958	0.924325	<0.001
hsa-miR-23b	8.89339	8.14903	-0.744366	0.001
hsa-miR-29c	7.56458	7.14764	-0.41694	0.04
hsa-miR-301a	5.23576	4.48897	-0.746793	0.004
hsa-miR-30e	8.59441	7.58303	-1.01138	<0.001
hsa-miR-324-5p	3.9583	5.11382	1.15551	<0.001
hsa-miR-375	5.65661	3.82842	-1.82819	<0.001
hsa-miR-376a	4.5717	3.06442	-1.50727	<0.001
hsa-miR-376c	5.20186	3.8023	-1.39956	<0.001
hsa-miR-493	7.0917	6.70042	-0.391271	0.03
hsa-miR-494	5.87322	9.85504	3.98182	<0.001
hsa-miR-663b	3.97797	5.12067	1.1427	0.001
hsa-miR-98	5.60322	6.28957	0.686355	<0.001
hsa-miR-99b	6.72356	5.72376	-0.9998	<0.001
Supplementary Table 1 B
