# Supplementary material for: Integrated MicroRNA and mRNA Signatures Associated with Survival in Triple Negative Breast Cancer
Source: PLoS One. 2013 Feb 6;8(2):e55910. doi: 10.1371/journal.pone.0055910 (PMC3566108; doi:10.1371/journal.pone.0055910)
Supplement: Table S2 — 103 deregulated miRNAs in the comparison Normal vs Mets in the entire cohort. (XLSX) [file pone.0055910.s007.xlsx]

## Sheet: Table S2
	Mean		logFC	Adj-p-value
miRNAs	Normal	Mets	Normal vs Mets	Normal vs Mets
hsa-let-7b	12.4251	11.6363	-0.79	<0.001
hsa-let-7c	10.6546	8.40593	-2.25	<0.001
hsa-let-7f	3.92966	6.2063	2.28	0.000530212
hsa-let-7g	9.99678	11.0411	1.04	<0.001
hsa-let-7i	10.0347	10.6578	0.62	<0.001
hsa-miR-100	9.66441	8.47222	-1.19	0.007
hsa-miR-101	5.8878	6.86519	0.98	0.00681984
hsa-miR-106a+hsa-miR-17	5.13661	6.23815	1.1	<0.001
hsa-miR-106b	4.28424	8.60037	4.32	<0.001
hsa-miR-10a	7.21932	6.00852	-1.21	0.0144029
hsa-miR-10b	6.14458	4.76778	-1.38	0.017774
hsa-miR-1179	4.31475	2.40667	-1.91	0.00118196
hsa-miR-1206	5.68085	3.40815	-2.27	<0.001
hsa-miR-1246	1.69	6.68889	5	<0.001
hsa-miR-125a-5p	7.96458	7.13667	-0.83	0.0160726
hsa-miR-125b	12.6229	9.71704	-2.91	<0.001
hsa-miR-1260	13.5781	13.1056	-0.47	0.031917
hsa-miR-128	1.41576	4.26148	2.85	<0.001
hsa-miR-1290	2.52864	6.14	3.61	<0.001
hsa-miR-1297	7.79373	6.23222	-1.56	<0.001
hsa-miR-1305	3.66898	5.13815	1.47	0.0105909
hsa-miR-130b	1.10814	4.25444	3.15	<0.001
hsa-miR-133a	11.0495	10.4556	-0.59	0.000915256
hsa-miR-135b	0.669492	3.80148	3.13	<0.001
hsa-miR-139-5p	4.26186	2.7063	-1.56	0.0184177
hsa-miR-141	5.06458	7.98518	2.92	<0.001
hsa-miR-142-3p	4.40136	8.76185	4.36	<0.001
hsa-miR-145	11.2732	9.05852	-2.21	<0.001
hsa-miR-146a	7.79593	8.76296	0.97	0.000611735
hsa-miR-146b-5p	4.13017	5.55815	1.43	0.00656369
hsa-miR-148a	7.29339	8.45704	1.16	0.00359024
hsa-miR-148b	4.47729	5.8437	1.37	<0.001
hsa-miR-151-3p	1.40203	4.63741	3.24	<0.001
hsa-miR-155	3.86847	6.78296	2.91	<0.001
hsa-miR-15a	5.99729	8.63333	2.64	<0.001
hsa-miR-15b	7.15102	8.52037	1.37	<0.001
hsa-miR-16	4.96729	11.7293	6.76	<0.001
hsa-miR-181a	6.78712	8.78074	1.99	<0.001
hsa-miR-183	1.70915	4.34444	2.64	<0.001
hsa-miR-186	5.02746	6.85889	1.83	<0.001
hsa-miR-196b	6.00203	4.87852	-1.12	0.00308654
hsa-miR-199b-5p	8.42949	6.67407	-1.76	0.00671878
hsa-miR-19b	7.72915	9.75593	2.03	<0.001
hsa-miR-200b	7.98102	9.28074	1.3	0.00415742
hsa-miR-203	1.7578	5.59296	3.84	<0.001
hsa-miR-205	11.8058	7.06148	-4.74	<0.001
hsa-miR-20a+hsa-miR-20b	0.690169	5.62296	4.93	<0.001
hsa-miR-21	10.1358	11.8852	1.75	<0.001
hsa-miR-216a	8.02119	5.26741	-2.75	<0.001
hsa-miR-22	6.64525	7.5063	0.86	0.0229423
hsa-miR-23b	8.89339	7.72037	-1.17	0.00124777
hsa-miR-25	8.26034	9.78926	1.53	<0.001
hsa-miR-26b	3.92695	8.11444	4.19	<0.001
hsa-miR-27a	7.07915	8.10889	1.03	0.00472628
hsa-miR-296-5p	4.79203	1.49852	-3.29	<0.001
hsa-miR-29b	4.55864	7.28741	2.73	<0.001
hsa-miR-29c	7.56458	8.43	0.87	0.00359024
hsa-miR-30c	8.83254	7.93444	-0.9	<0.001
hsa-miR-30d	8.04509	7.46148	-0.58	0.0165615
hsa-miR-30e	8.59441	7.81148	-0.78	0.0182357
hsa-miR-324-5p	3.9583	4.91444	0.96	0.0285261
hsa-miR-331-3p	2.83542	4.19333	1.36	0.0105909
hsa-miR-340	4.55729	6.37185	1.81	<0.001
hsa-miR-374a	4.19492	7.67333	3.48	<0.001
hsa-miR-374b	4.2178	6.72	2.5	<0.001
hsa-miR-375	5.65661	3.54111	-2.12	0.00754134
hsa-miR-376a	4.5717	1.75593	-2.82	<0.001
hsa-miR-376c	5.20186	1.71074	-3.49	<0.001
hsa-miR-379	6.57831	3.53148	-3.05	<0.001
hsa-miR-421	1.32763	4.77111	3.44	<0.001
hsa-miR-423-5p	8.30237	7.40852	-0.89	<0.001
hsa-miR-425	4.3439	5.99222	1.65	<0.001
hsa-miR-429	1.02034	4.81111	3.79	<0.001
hsa-miR-450b-5p	5.02271	2.83667	-2.19	<0.001
hsa-miR-451	9.16729	7.45333	-1.71	0.00132334
hsa-miR-484	3.36305	5.7837	2.42	<0.001
hsa-miR-490-3p	2.0922	4.92407	2.83	<0.001
hsa-miR-493	7.09	6.53	-0.56	0.04
hsa-miR-494	5.87322	8.89667	3.02	0.00753687
hsa-miR-495	5.19017	1.88704	-3.3	<0.001
hsa-miR-497	8.19881	7.22185	-0.98	0.0208798
hsa-miR-509-3p	3.16881	5.82333	2.65	<0.001
hsa-miR-523	5.6383	3.33518	-2.3	<0.001
hsa-miR-526a-hsa-miR-518d-5p-hsa-miR-520c-5p	7.14034	5.56815	-1.57	<0.001
hsa-miR-532-5p	1.15085	4.35482	3.2	<0.001
hsa-miR-542-3p	9.60881	6.06667	-3.54	<0.001
hsa-miR-548g	7.56153	2.67556	-4.89	<0.001
hsa-miR-574-3p	5.30627	3.40111	-1.91	0.00206347
hsa-miR-579	4.68796	0.121111	-4.57	<0.001
hsa-miR-592	4.55864	1.56	-3	<0.001
hsa-miR-600	5.54542	3.74481	-1.8	<0.001
hsa-miR-627	4.07644	2.01333	-2.06	<0.001
hsa-miR-655	6.85576	4.72667	-2.13	<0.001
hsa-miR-660	0.892034	4.77889	3.89	<0.001
hsa-miR-663b	3.97797	5.35185	1.37	0.0223549
hsa-miR-708	1.22678	6.69259	5.47	<0.001
hsa-miR-885-5p	8.37305	7.2363	-1.14	<0.001
hsa-miR-890	4.85254	3.20519	-1.65	0.00641065
hsa-miR-9	1.2378	4.30185	3.06	0.000507112
hsa-miR-93	5.60644	7.87222	2.27	<0.001
hsa-miR-96	5.96356	7.83963	1.88	<0.001
hsa-miR-98	5.60322	6.79037	1.19	<0.001
hsa-miR-99a	11.1224	8.62963	-2.49	<0.001
Supplementary Table 2
