# Supplementary material for: Integrated MicroRNA and mRNA Signatures Associated with Survival in Triple Negative Breast Cancer
Source: PLoS One. 2013 Feb 6;8(2):e55910. doi: 10.1371/journal.pone.0055910 (PMC3566108; doi:10.1371/journal.pone.0055910)
Supplement: Table S3 — 15 miRNAs differentially expressed across the three tissue group comparisons. (XLSX) [file pone.0055910.s008.xlsx]

## Sheet: Supp_Table_3
	Mean			logFC			Adj-p-value
miRNAs	Normal	Tumor	Mets	Normal vs Tumor	Tumor vs Mets	Normal vs Mets	Normal vs Tumor	Tumor vs Mets	Normal vs Mets
hsa-miR-10b	6.14458	2.62285	4.56	-3.52173	1.93715	-1.58458	<0.001	<0.001	<0.001
hsa-miR-125b	12.6229	10.5948	9.86	-2.02809	-0.734794	-2.76289	<0.001	0.0253685	<0.001
hsa-miR-128	1.41576	2.92746	4.08	1.51169	1.15254	2.66424	<0.001	0.0253685	<0.001
hsa-miR-1297	7.79373	6.81255	6.36	-0.981185	-0.452545	-1.43373	<0.001	0.0496766	0.02
hsa-miR-205	11.8058	9.31115	7.58	-2.49461	-1.73115	-4.22577	<0.001	0.0197887	<0.001
hsa-miR-26b	3.92695	6.19291	7.59	2.26596	1.39709	3.66305	<0.001	0.0374323	<0.001
hsa-miR-29b	4.55864	6.08703	7.05	1.52839	0.96297	2.49136	<0.001	0.0216229	<0.001
hsa-miR-29c	7.56458	7.14764	8.22	-0.41694	1.07236	0.655424	0.0418503	<0.001	0.00359024
hsa-miR-376c	5.20186	3.8023	2.13	-1.39956	-1.6723	-3.07186	<0.001	<0.001	<0.001
hsa-miR-379	6.58	4.7	3.57	-1.88	-1.13	-3.01	<0.001	<0.001	<0.001
hsa-miR-495	5.19017	3.41709	2.05	-1.77308	-1.36709	-3.14017	<0.001	<0.001	<0.001
hsa-miR-509-3p	3.16881	4.24139	5.46	1.07258	1.21861	2.29119	0.00272375	0.00876085	<0.001
hsa-miR-542-3p	9.60881	8.54206	5.88	-1.06675	-2.66206	-3.72881	<0.001	<0.001	<0.001
hsa-miR-548g	7.56153	4.35576	2.91	-3.20577	-1.44576	-4.65153	<0.001	0.0292764	<0.001
hsa-miR-660	0.892034	3.41636	4.73	2.52433	1.31364	3.83797	<0.001	0.02008	<0.001
Supplementary Table 3
