# Supplementary material for: Integrated MicroRNA and mRNA Signatures Associated with Survival in Triple Negative Breast Cancer
Source: PLoS One. 2013 Feb 6;8(2):e55910. doi: 10.1371/journal.pone.0055910 (PMC3566108; doi:10.1371/journal.pone.0055910)
Supplement: Table S4 — Dysregulated mRNAs in Normal vs Tumor comparison in the entire cohort. (XLSX) [file pone.0055910.s009.xlsx]

## Sheet: Table S4
	Mean		logFC	Adj-p-value
Gene Name	Normal	Tumor	Normal vs Tumor	Normal vs Tumor
ABCB1	6.75	4.56	-2.19	<0.001
AKT1	4.38	3.02	-1.36	<0.001
AR	7.27	5.05	-2.22	<0.001
AREG	5.5	3.59	-1.91	<0.001
ATM	4.11	2.78	-1.33	<0.001
BCL2	7.28	5.52	-1.76	<0.001
BCL6	8.47	6.95	-1.52	<0.001
BIRC5	4.97	6.87	1.9	<0.001
CASP10	4.54	3.15	-1.39	<0.001
CAV1	8.46	5.59	-2.87	<0.001
CCND2	8.38	6.49	-1.89	<0.001
CD34	9.11	6.05	-3.06	<0.001
CDC2	5.59	6.78	1.19	<0.001
CDH11	8.68	8.02	-0.66	<0.001
CDK6	6.14	5.27	-0.87	<0.001
CDKN1A	8.64	6.89	-1.75	<0.001
CDKN2A	0.8	3.4	2.6	0.02
CDKN2C	7.28	6.08	-1.2	<0.001
CEBPA	7.59	5.8	-1.79	<0.001
CSF1R	6.59	5.07	-1.52	<0.001
CSF3	4.04	2.31	-1.73	<0.001
CSF3R	6.37	5.06	-1.31	<0.001
CTGF	11.48	10.13	-1.35	<0.001
CYP1A1	4.62	3.12	-1.5	<0.001
DLC1	7.32	4.08	-3.24	<0.001
EGF	6.34	4.45	-1.89	<0.001
EGFR	8.46	6.71	-1.75	<0.001
EGR1	9.75	6.29	-3.46	<0.001
EPS8	8.47	6.66	-1.81	<0.001
ERBB4	5.42	2.88	-2.54	<0.001
ESR1	7.6	4.18	-3.42	<0.001
ETS1	8.92	7.79	-1.13	<0.001
ETS2	9.3	7.4	-1.9	<0.001
ETV1	6.59	5.06	-1.53	<0.001
FAS	5.59	4.2	-1.39	<0.001
FGF1	6.5	4.69	-1.81	<0.001
FGF2	7.32	4.83	-2.49	<0.001
FGFR1	8.9	6.69	-2.21	<0.001
FGFR2	6.38	5.61	-0.77	0.01
FGFR3	6.67	5.92	-0.75	<0.001
FGFR4	6.19	4.94	-1.25	<0.001
FGR	6.4	5.13	-1.27	<0.001
FLT1	6.1	4.49	-1.61	<0.001
FLT3	3.67	2.65	-1.02	<0.001
FOLR1	6.66	5.72	-0.94	<0.001
FOS	12.59	9.32	-3.27	<0.001
FOSL2	10.19	8.96	-1.23	<0.001
FRZB	7.4	5.21	-2.19	<0.001
FYN	8.32	6.76	-1.56	<0.001
GAS1	8.29	6.39	-1.9	<0.001
GATA1	3.72	2.38	-1.34	<0.001
GNAS	5.67	4.28	-1.39	<0.001
GRB7	5.36	4.64	-0.72	<0.001
HCK	7.13	6.14	-0.99	<0.001
IGF1	9.06	5.99	-3.07	<0.001
IGFBP2	7.74	6.2	-1.54	<0.001
IGFBP3	9.09	7.93	-1.16	<0.001
IGFBP6	9.64	5.7	-3.94	<0.001
IL1A	3.92	2.65	-1.27	<0.001
IL1B	5.57	4.45	-1.12	<0.001
IL4	3.25	1.79	-1.46	<0.001
IL6	6.19	3.74	-2.45	<0.001
IRF1	6.12	5.38	-0.74	<0.001
JUN	9.71	7.49	-2.22	<0.001
JUNB	9.25	7.06	-2.19	<0.001
KDR	7.05	5.38	-1.67	<0.001
KIT	6.3	3.93	-2.37	<0.001
L1CAM	5.25	4.55	-0.7	<0.001
LAMB1	8.16	6.54	-1.62	<0.001
LCK	5.45	4.7	-0.75	<0.001
LIF	6.31	4.81	-1.5	<0.001
LMO1	3.63	2.73	-0.9	<0.001
LMO2	6.37	4.46	-1.91	<0.001
MAP3K8	7.04	5.47	-1.57	<0.001
MAPK10	6.06	4.37	-1.69	<0.001
MET	7.19	5.76	-1.43	<0.001
MMP2	9.85	8	-1.85	<0.001
MMP9	6.56	8.09	1.53	<0.001
MPL	3.75	2.35	-1.4	<0.001
MYB	7	5.73	-1.27	<0.001
MYBL2	5.05	7.3	2.25	<0.001
MYC	9.54	8.14	-1.4	<0.001
MYCN	5.54	4.47	-1.07	<0.001
NGFR	8.04	4.57	-3.47	<0.001
NTRK1	5.16	3.4	-1.76	<0.001
NTRK2	8.66	5.72	-2.94	<0.001
NTRK3	4.79	3.08	-1.71	<0.001
PDGFA	7.02	5.09	-1.93	<0.001
PDGFRA	9.88	7.51	-2.37	<0.001
PDGFRB	9.54	7.46	-2.08	<0.001
PIM1	9.91	8.38	-1.53	<0.001
PLA2G2A	6.4	3.74	-2.66	<0.001
PLAT	8.68	6.35	-2.33	<0.001
PLG	3.53	2.21	-1.32	<0.001
PPARG	6.49	3.88	-2.61	<0.001
PTHLH	5.9	3.78	-2.12	<0.001
PTPRG	6.21	4.49	-1.72	<0.001
RB1	7.22	5.94	-1.28	<0.001
RET	4.98	3.56	-1.42	<0.001
S100A4	9.92	8.59	-1.33	<0.001
SERPINE1	9.11	7.66	-1.45	<0.001
SPI1	8.36	7.46	-0.9	<0.001
SPP1	5.5	7.55	2.05	<0.001
TAL1	5.95	3.74	-2.21	<0.001
TEK	5.18	3.02	-2.16	<0.001
TERT	3.9	2.9	-1	<0.001
TGFA	5.28	4.38	-0.9	<0.001
TGFB1	8.24	7.27	-0.97	<0.001
TGFBI	9.91	8.98	-0.93	<0.001
TGFBR2	8.99	6.64	-2.35	<0.001
TGFBR3	9.41	5.88	-3.53	<0.001
THPO	5.2	3.59	-1.61	<0.001
TIMP1	10.23	9.45	-0.78	<0.001
TIMP2	11.56	9.84	-1.72	<0.001
TIMP3	10.99	9.28	-1.71	<0.001
TNFRSF1B	9.23	7.68	-1.55	<0.001
TNFSF10	9.18	8.01	-1.17	<0.001
TOP2A	4.94	6.76	1.82	<0.001
TP53	8.21	7.41	-0.8	<0.001
WEE1	4.09	2.52	-1.57	<0.001
WFDC2	8.02	6.03	-1.99	<0.001
WNT1	3.93	2.52	-1.41	<0.001
WNT10B	4.24	2.86	-1.38	<0.001
WT1	5.06	3.96	-1.1	<0.001
Supplementary Table 4
